# Supplementary material
Source: MDPI journal article supplement (https://www.mdpi.com/2073-4441/9/12/965)
Supplement: s1 [file s1]

## Sheet: SCDs_Elevation_Relation
Mean of Elevation	SCDs
352.725	0
1205.25	1
1549.27	2
1674.27	3
1742.38	4
1795.13	5
1831.65	6
1841.1	7
1812.25	8
1837.53	9
1918.75	10
1979.63	11
2010.75	12
2042.1	13
2070.89	14
2088.16	15
2098.58	16
2107.94	17
2117.59	18
2139.27	19
2130.81	20
2156.95	21
2173.44	22
2183.73	23
2198.65	24
2215.67	25
2242.63	26
2250.2	27
2258.64	28
2279.27	29
2289.45	30
2301.83	31
2322.35	32
2336.35	33
2350.68	34
2368.92	35
2385.54	36
2389.64	37
2397.72	38
2407.01	39
2429.88	40
2443.65	41
2460.79	42
2476.94	43
2478.8	44
2509.71	45
2530.39	46
2558.45	47
2565.14	48
2585.03	49
2604.41	50
2620.81	51
2632.3	52
2636.55	53
2639.43	54
2676.34	55
2659.72	56
2675.99	57
2678.49	58
2704.85	59
2724.36	60
2710.74	61
2725.97	62
2734.29	63
2749.57	64
2775.17	65
2796.45	66
2790.23	67
2813.23	68
2816.42	69
2847.64	70
2852.91	71
2864.65	72
2878.47	73
2888.74	74
2919.49	75
2908.57	76
2900.96	77
2910.86	78
2921.69	79
2931.73	80
2939.64	81
2963.47	82
2969.89	83
2956.28	84
3001.95	85
3015.5	86
3003.41	87
3014.14	88
3036.49	89
3072.27	90
3070.01	91
3094.76	92
3081.23	93
3102.51	94
3123.21	95
3152.63	96
3141	97
3170.88	98
3162.12	99
3232.1	100
3262.61	101
3259.59	102
3295.71	103
3274.58	104
3281.04	105
3359.33	106
3370.79	107
3301.16	108
3436.45	109
3299.83	110
3455.94	111
3409.25	112
3353.21	113
3353.01	114
3448.45	115
3425.26	116
3446.39	117
3453.29	118
3420.06	119
3405.63	120
3380.95	121
3419.29	122
3439.92	123
3397.25	124
3383.75	125
3373	126
3416	127
3340	128

## Sheet: SCDs_LST_Relation
Mean of LST	SCDs
35.7169	0
32.2553	1
33.2212	2
32.1387	3
30.2219	4
29.4067	5
28.8631	6
28.4662	7
28.14	8
28.0069	9
27.8118	10
27.5546	11
27.3032	12
27.1396	13
26.7861	14
26.7272	15
26.4386	16
26.2162	17
26.0121	18
25.7997	19
25.9095	20
25.9303	21
25.7913	22
25.6084	23
25.6046	24
25.342	25
25.3083	26
25.2425	27
25.2111	28
25.1997	29
25.1628	30
24.9707	31
24.8815	32
24.7036	33
24.5844	34
24.4721	35
24.3502	36
24.4441	37
24.1358	38
24.1806	39
24.0853	40
23.9003	41
23.9676	42
23.5492	43
23.2948	44
23.2587	45
22.3965	46
22.4691	47
21.9845	48
21.9918	49
21.5524	50
21.5142	51
21.4699	52
21.2942	53
21.064	54
21.0021	55
20.7183	56
20.7399	57
20.5685	58
20.3786	59
20.1906	60
20.1638	61
19.8963	62
19.9297	63
19.7599	64
19.4287	65
19.1853	66
19.1603	67
18.4824	68
18.4515	69
17.9565	70
17.8769	71
17.3237	72
17.345	73
16.8416	74
16.738	75
16.6998	76
16.1056	77
16.275	78
16.3007	79
16.1645	80
15.9931	81
15.741	82
15.7312	83
15.4066	84
15.5499	85
14.9095	86
14.9774	87
14.8154	88
14.6289	89
14.2615	90
14.5102	91
14.4026	92
14.0024	93
13.6952	94
12.9112	95
13.5073	96
13.1804	97
12.5379	98
12.8121	99
12.646	100
12.0467	101
12.0514	102
12.127	103
11.5622	104
11.2145	105
11.1153	106
10.2335	107
10.7942	108
10.8422	109
9.73565	110
10.4667	111
10.2705	112
10.1551	113
9.72328	114
10.4255	115
9.82744	116
9.33669	117
9.74875	118
7.77797	119
9.74248	120
9.94146	121
10.2786	122
9.50501	123

## Sheet: Winter_SCDs_LST
Year	Winter LST	Winter SCD
2003	10.8926	12.3633
2003	12.7979	13.708
2003	8.95281	20.85
2003	10.7151	15.0434
2003	8.84618	20.3782
2003	11.2906	16.8334
2003	12.2158	8.60893
2003	13.8571	8.06701
2003	11.1045	14.3627
2003	11.934	8.82373
2003	13.9501	10.0802
2003	10.4134	19.2192
2003	13.9519	5.53668
